# Supplementary material
Source: HighWire-hosted journal article supplement (https://erj.ersjournals.com/content/56/3/2002571)
Supplement: inline-supplementary-material-1 [file inline-supplementary-material-1.pdf]

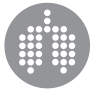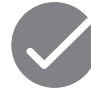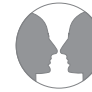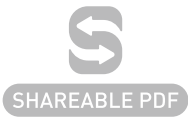

# Rationale and significance of patient selection in awake prone positioning for COVID-19 pneumonia

Ziqin Ng <sup>1</sup>, Woo Chiao Tay<sup>2</sup> and Choon Heng Benjamin Ho <sup>1</sup>

**Affiliations:** <sup>1</sup>Dept of Respiratory and Critical Care Medicine, Tan Tock Seng Hospital, Singapore, Singapore. <sup>2</sup>Dept of Internal Medicine, Tan Tock Seng Hospital, Singapore, Singapore.

**Correspondence:** Ng Ziqin, Dept of Respiratory and Critical Care Medicine, Tan Tock Seng Hospital, 11 Jalan Tan Tock Seng, Singapore 308433. E-mail: ziqin.ng@mohh.com.sg

 @ERSpublications

**Preliminary evidence suggests that awake prone positioning can be a low-risk, low-cost manoeuvre which can help patients with COVID-19 pneumonia delay or reduce the need for intensive care** <https://bit.ly/2OpwHGF>

**Cite this article as:** Ng Z, Tay WC, Ho CHB. Rationale and significance of patient selection in awake prone positioning for COVID-19 pneumonia. *Eur Respir J* 2020; 56: 2002571 [<https://doi.org/10.1183/13993003.02571-2020>].

This single-page version can be shared freely online.

*From the authors:*

We thank C.F. Huang and co-workers for the points raised regarding our published paper entitled “Awake prone positioning for non-intubated oxygen dependent COVID-19 pneumonia patients” [1].
